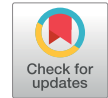

# Erratum

**Erratum. Association Between Serum IGF-1 and Diabetes Among U.S. Adults. Diabetes Care 2010;33:2257—2259**

*Srinivas Teppala and Anoop Shankar*

<https://doi.org/10.2337/dc17-er08>

In the article cited above, author Srinivas Teppala reported his academic degrees as MD, MPH. According to the author, the correct academic degrees are MBBS, MPH.
